# Supplementary material for: Analysis and optimization of process parameters for in vitro biomineralization of CaCO3 by Klebsiella pneumoniae, isolated from a stalactite from the Sahastradhara cave
Source: Royal Society of Chemistry journal article supplement (doi:10.1039/d0ra00090f), 2020-01-01
Supplement: d0ra00090f1.pdf [file d0ra00090f1.pdf]

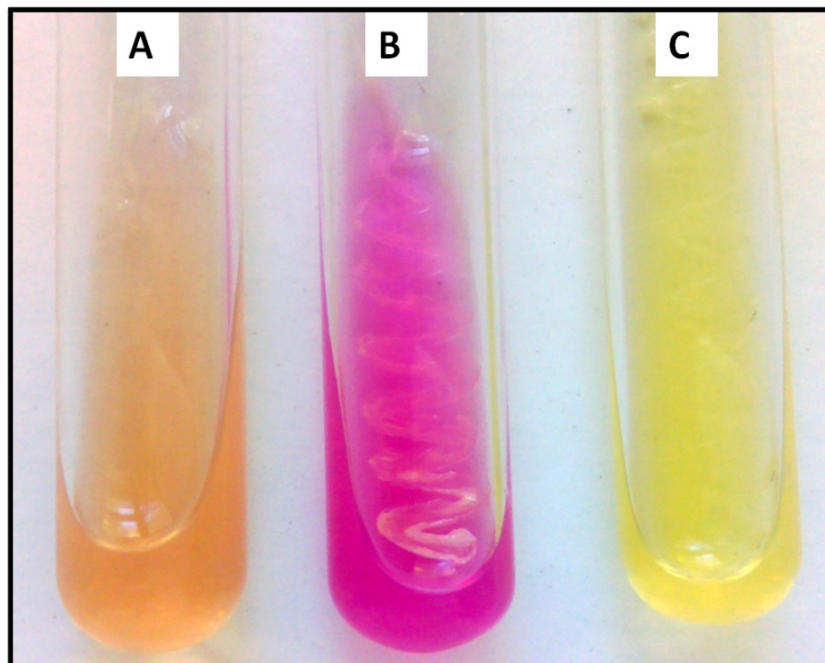

**Fig. S1: Qualitative test for urease enzyme production**  
(A) Control (B) Positive result (C) Negative result

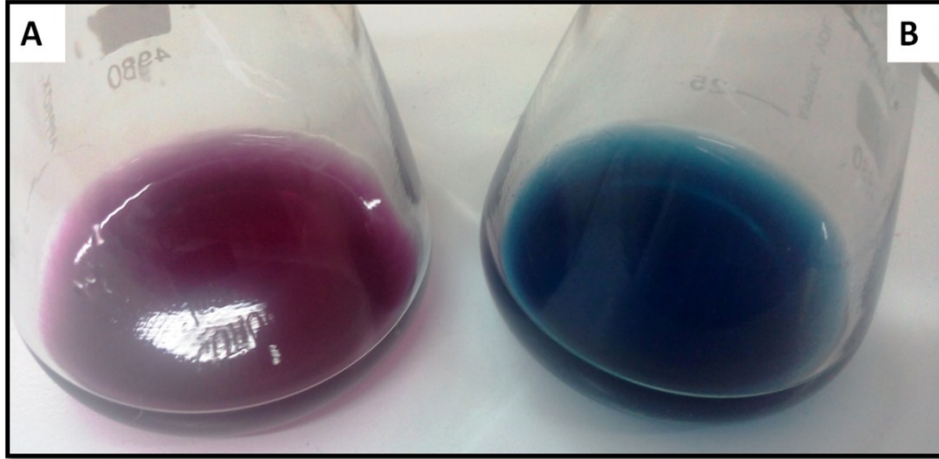

**Fig. S2: Quantitative estimation of calcium carbonate**  
(A) Before titration; (B) After titration

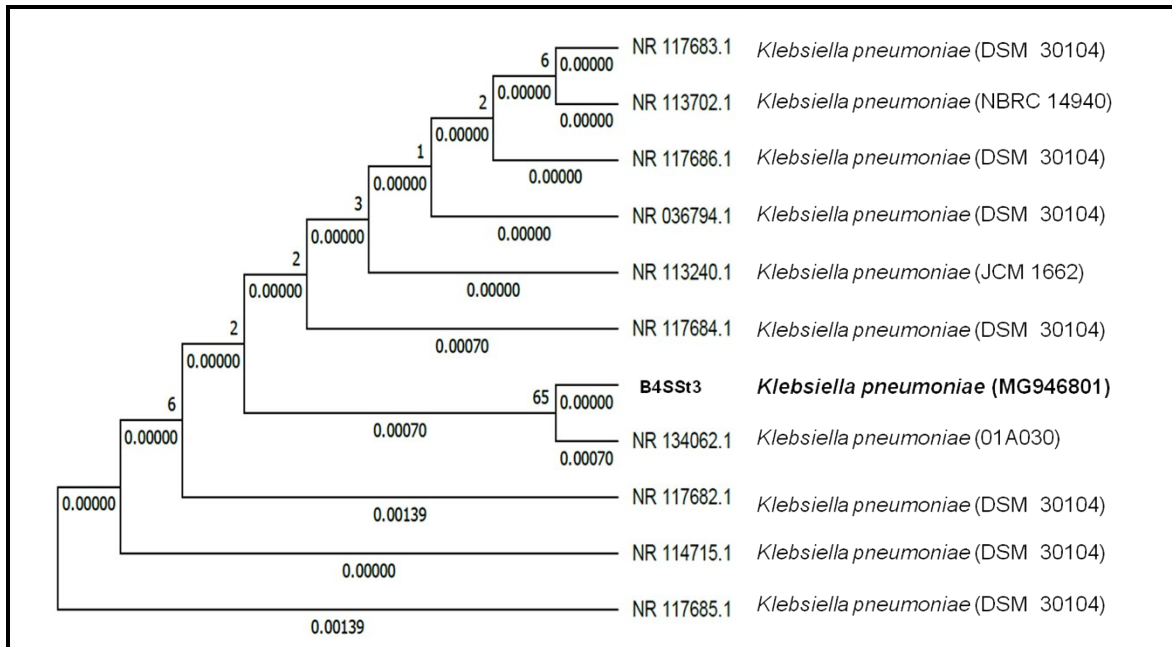

**Fig. S3: Phylogenetic tree for B4SSt3 - *Klebsiella pneumoniae* (MG946801)**

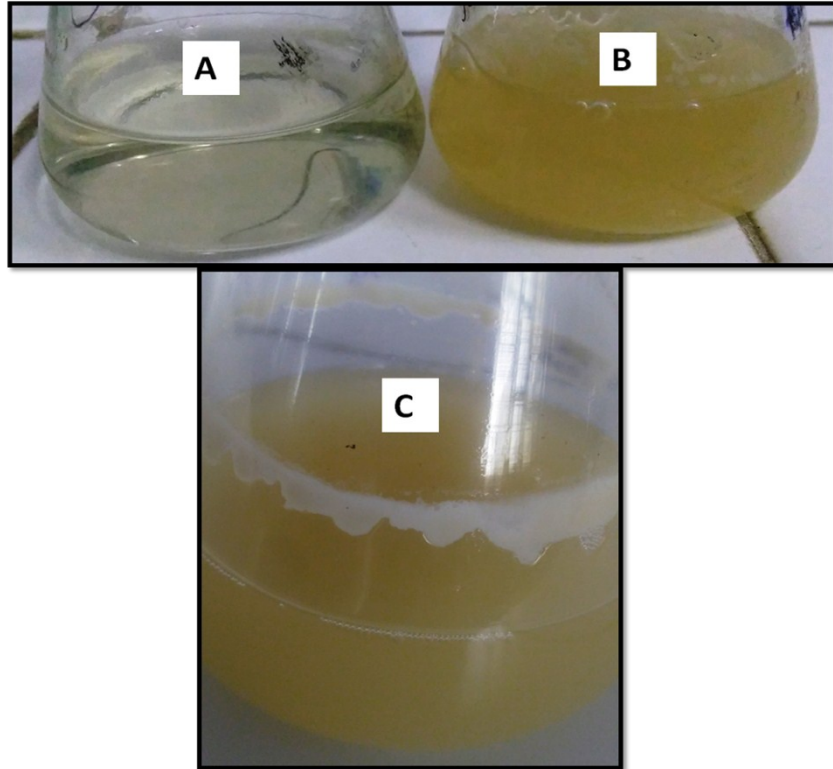

**Fig. S4: Precipitation of calcium carbonate by B4SSt3 under optimized conditions**

(A) Control; (B) Color change after mineral precipitation; (C) Thick layer of calcium carbonate along the walls of flask
